1 **Benchmarking the accuracy of structure-based binding affinity predictors on**  
2 **Spike-ACE2 Deep Mutational Interaction Set**

3 Burcu Ozden<sup>1,2</sup>, Eda Şamiloğlu<sup>1,2</sup>, Atakan Özsan<sup>1</sup>, Mehmet Erguven<sup>1</sup>, Mehdi Koşaca<sup>1,2</sup>, Melis  
4 Oktayoğlu<sup>1</sup>, Can Yükrük<sup>1</sup>, Nazmiye Arslan<sup>1</sup>, Gökhan Karakülah<sup>1,2</sup>, Ayşe Berçin Barlas<sup>1,2</sup>, Büşra  
5 Savaş<sup>1,2</sup>, Ezgi Karaca<sup>1,2</sup>

6  
7 <sup>1</sup>Izmir Biomedicine and Genome Center, Dokuz Eylül University Health Campus, Balçova,

8 Izmir 35330, Turkey

9 <sup>2</sup>Izmir International Biomedicine and Genome Institute, Dokuz Eylül University, Izmir 35340,

10 Turkey

11 Correspondence: [ezgi.karaca@ibg.edu.tr](mailto:ezgi.karaca@ibg.edu.tr)

12

13

14

15 **ABSTRACT**

16           Since the start of COVID-19 pandemic, a huge effort has been devoted to  
17 understanding the Spike (SARS-CoV-2)-ACE2 recognition mechanism. To this end, two deep  
18 mutational scanning studies traced the impact of all possible mutations across Receptor  
19 Binding Domain (RBD) of Spike and catalytic domain of human ACE2. By concentrating on  
20 the interface mutations of these experimental data, we benchmarked six commonly used  
21 structure-based binding affinity predictors (FoldX, EvoEF1, MutaBind2, SSIPe, HADDOCK,  
22 and UEP). These predictors were selected based on their user-friendliness, accessibility, and  
23 speed. As a result of our benchmarking efforts, we observed that none of the methods  
24 could generate a meaningful correlation with the experimental binding data. The best  
25 correlation is achieved by FoldX ( $R = -0.51$ ). Also, when we simplified the prediction  
26 problem to a binary classification, i.e., whether a mutation is enriching or depleting the  
27 binding, we showed that the highest accuracy is achieved by FoldX with 64% success rate.  
28 Surprisingly, on this set, simple energetic scoring functions performed significantly better  
29 than the ones using extra evolutionary-based terms, as in Mutabind and SSIPe.  
30 Furthermore, we also demonstrated that recent AI approaches, mmCSM-PPI and  
31 TopNetTree, yielded comparable performances to the force field-based techniques. These  
32 observations suggest plenty of room to improve the binding affinity predictors in guessing  
33 the variant-induced binding profile changes of a host-pathogen system, such as Spike-ACE2.  
34 To aid such improvements we provide our benchmarking data at [https://github.com/CSB-](https://github.com/CSB-KaracaLab/RBD-ACE2-MutBench)  
35 [KaracaLab/RBD-ACE2-MutBench](https://github.com/CSB-KaracaLab/RBD-ACE2-MutBench) with the option to visualize our mutant models at  
36 <https://rbd-ace2-mutbench.github.io/>

37

38 **Key words:** binding affinity prediction, deep mutagenesis, SARS-CoV-2, ACE2, RBD

## 39 INTRODUCTION

40 At the beginning of 21<sup>st</sup> century, the emergence of Severe Acute Respiratory  
41 Syndrome Coronavirus (SARS-CoV)[1] and Middle East Respiratory Syndrome Coronavirus[2]  
42 led to serious public health concerns. Evolving from these viruses, during late 2019, a new  
43 SARS virus, SARS-CoV-2, caused the most severe pandemic of the 21<sup>st</sup> century[3]. SARS-CoV-  
44 2 infection is initiated upon having its Spike protein interacting with the host Angiotensin  
45 Converting 2 (ACE2) enzyme[4]. The widespread infection of SARS-CoV-2 compared to its  
46 predecessors was linked to higher binding affinity of Spike to ACE2[5]. Relatedly, alpha,  
47 beta, gamma, eta, iota, kappa, lambda, mu, and omicron SARS-CoV-2 variants were shown  
48 to have at least one mutation across the Spike-ACE2 interface[6]. This realization placed the  
49 characterization of interfacial Spike-ACE2 mutations at the center of COVID-19-related  
50 research. Within this context, in 2020, two deep mutational scanning (DMS) studies  
51 explored how Spike/ACE2 variants impact Spike-ACE2 interactions[7,8]. In these DMS  
52 studies, the residues on the Receptor Binding Domain (RBD) of Spike and the catalytic  
53 domain of human ACE2 were mutated into other 19 amino acid possibilities, followed by  
54 tracing of new RBD-ACE2 binding profiles.

55 In parallel to these experimental efforts, a handful of structure-based computational  
56 studies employed a comprehensive investigation of variation across the RBD-ACE2 interface  
57 (Table 1). Three such studies utilized two fast and user-friendly tools, FoldX and HADDOCK  
58 [9–11]. Blanco *et al.* used FoldX with the inclusion of water molecules (FoldXwater) to trace  
59 the binding enhancing RBD and ACE2 mutations [9]. From their 21 binding enhancing  
60 mutation predictions, nine of them were confirmed as affinity enhancing by the DMS set.  
61 Rodrigues *et al.* investigated the impact of ACE2 orthologs on their RBD binding with

62 HADDOCK, where they proposed five significantly affinity improving ACE2 mutations[10].  
63 Among these, D30E and A387E were shown to be affinity enhancing in the ACE2 DMS set as  
64 well. Complementary to this study, Sorokina *et al.* performed computational alanine  
65 scanning on ACE2 with HADDOCK[11]. Here, three out of five mutations (N49A, R393A, and  
66 P389A) were classified as binding enriching both by the computational predictions and the  
67 DMS set. Two other studies made use of elaborate simulation techniques, mainly molecular  
68 dynamics simulations. Laurini *et al.* performed molecular mechanics/Poisson-Boltzmann  
69 alanine scanning and molecular dynamics simulations to find structurally and energetically  
70 critical RBD-ACE2 residues[12]. They proposed eight hotspot positions on RBD and ACE2,  
71 where three of them were characterized as affinity enhancing in the DMS sets. Gheeraert *et*  
72 *al.* performed 1  $\mu$ s long molecular dynamics simulations of five RBD variants (alpha, beta,  
73 gamma, delta, and epsilon) in complex with ACE2[13]. They found that L452R, T478K (delta  
74 variant) and N501Y (alpha, gamma variants) cause drastic structural changes across the  
75 RBD-ACE2 interface. These mutations were classified as binding enriching in the RBD DMS  
76 set.

77 **Table 1. Affinity impacting RBD and ACE2 variant/hotspot predictions.** The predictions agreeing  
78 with the experimental are underlined and shown in bold.

| Work carried out by      | Important RBD residues/mutations                                              | Important ACE2 residues/ mutations | Approach                                                         |
|--------------------------|-------------------------------------------------------------------------------|------------------------------------|------------------------------------------------------------------|
| Blanco <i>et al.</i> [9] | V445M/R/W,<br><b><u>Q493F/L/M/Y,</u></b><br><b><u>Q498F/L/M/Y,</u></b> T500K, | G326E                              | Variant modeling and interface score calculation with FoldXwater |

|                              |                                                                 |                                                                                  |                                                                                       |
|------------------------------|-----------------------------------------------------------------|----------------------------------------------------------------------------------|---------------------------------------------------------------------------------------|
|                              | <b><u>N501A/C/L/S/I</u></b><br><b><u>V503R/W/Y</u></b>          |                                                                                  |                                                                                       |
| Rodrigues <i>et al.</i> [10] |                                                                 | Q24E, <b><u>D30E</u></b> , H34Y,<br>L79H, <b><u>A387E</u></b>                    | Variant modeling and interface score calculation with HADDOCK                         |
| Sorokina <i>et al.</i> [11]  |                                                                 | <b><u>N49A</u></b> , <b><u>R393A</u></b> , M383A,<br><b><u>P389A</u></b> , G354A | Alanine scanning and interface score calculation with HADDOCK                         |
| Laurini <i>et al.</i> [12]   | <b><u>Q498</u></b> , T500, R403                                 | D38, <b><u>K31</u></b> , E37, K353,<br><b><u>Y41</u></b>                         | Interaction and energy analysis through molecular dynamics and MM/PB alanine scanning |
| Gheeraert <i>et al.</i> [13] | <b><u>L452R</u></b> , <b><u>T478K</u></b> , <b><u>N501Y</u></b> |                                                                                  | Interaction analysis through MD simulations                                           |

79

80 As presented in Table 1, accurate reproduction of RBD-ACE2 DMS profiles can be  
81 tricky even when elaborate simulation techniques are used. So, if such time-intensive  
82 simulation approaches are facing challenges in back-calculating the impact of RBD-ACE2  
83 interface variation, how far are the fast prediction tools that were heavily used in the early  
84 months of pandemic, such as FoldX and HADDOCK, from accurately predicting the impact of  
85 RBD-ACE2 variations? To answer this question, we benchmarked six fast affinity prediction

86 tools, i.e., FoldX, HADDOCK, EvoEF1, MutaBind2, SSIPe, and UEP [14–20] against the Spike-  
87 ACE2 interface DMS set. These predictors were selected based on their user-friendliness and  
88 speed, since we wanted to put an emphasis on the accessibility of these tools to the  
89 researchers who may not have programming experience or enough computing resources.  
90 Among these tools, FoldX and EvoEF1 use intra- and inter-molecular energies derived from  
91 empirical force field terms. HADDOCK scores complexes by combining intermolecular van  
92 der Waals, electrostatics, and empirical desolvation terms. Mutabind and SSIPe utilize FoldX  
93 and EvoEF1, respectively, to model the mutations. Both methods have their own scoring  
94 functions to consider evolutionary-based information too. UEP scores mutations based on  
95 statistically determined intermolecular contact potentials. HADDOCK, MutaBind2, and SSIPe  
96 can be run through a web service. FoldX can be called over a GUI through a YASARA plugin.  
97 EvoEF1 and UEP are available as stand-alone packages. On top of these conventional tools,  
98 we also tested two AI approaches, mmCSM-PPI[21,22] and TopNetTree[23,24] to investigate  
99 the impact of AI use in predicting RBD-ACE2 interaction changes. Our benchmarking files  
100 can be accessed at <https://github.com/CSB-KaracaLab/RBD-ACE2-MutBench> with the option  
101 to visualize our mutant models at <https://rbd-ace2-mutbench.github.io/>  
102

## 103 **RESULTS and DISCUSSION**

### 104 **Benchmark Compilation**

105       The deep mutational scanning (DMS) experiments performed by Chan *et al.* and  
106 Starr *et al.* [7,8] scan the impact of all possible amino acid variations imposed on the RBD  
107 domain of Spike and the catalytic domain of ACE2 on RBD-ACE2 binding. These studies  
108 classified mutations as binding enriching or depleting when compared to the wild type  
109 interactions. While compiling our benchmark set, our aim was (i) to select the DMS subset  
110 reporting on the variations across RBD-ACE2 interface, since the selected methods are  
111 tuned to predict the impact of interface mutations, (ii) to include an equal number of  
112 binding enriching and depleting cases to obtain a balanced benchmark set.

113       The DMS sets contained 988 interfacial mutations, measured over 26 RBD and 26  
114 ACE2 residues (calculated by PDBePISA[25] on 6m0j PDB[26]). 13% of these 988 mutations  
115 were profiled as binding enriching (42 for RBD and 89 for ACE2, Figure 1A) and the rest as  
116 binding depleting. As shown in Figure 1A, the binding enriching RBD mutations span a  
117 narrow enrichment range [0.01, 0.30], while for ACE2 this range increases to [0.03, 3.37].  
118 We added all enriching cases into our benchmark. To fairly represent the depleting cases,  
119 we selected 131 mutations sampling the whole depleting data spread (Figure 1A). We then  
120 analyzed the individual binding profiles of selected mutations with heatmaps (Figure 1B). As  
121 can be observed from these heatmaps, on the RBD side, several mutations on Q493, S477,  
122 F490, N501, V503, E484, Q498 lead to better RBD-ACE2 binding (Figure 1B, Figure S1, Table  
123 S1). Among these, Q493R and S477N were observed in omicron; E484K in beta, gamma, eta,  
124 iota, mu; E484Q in kappa; N501Y in alpha, beta, gamma, mu, omicron variants[6]. On the  
125 ACE2 surface, the top enriching mutations came from T27, Q42, S19, and L79 positions  
126 (Figure 1C, Figure S1). All these residues, except S19, were reported as species-associated

127 variations[27]. While appearing less frequently as binding enhancers, K31, E35, M82, and  
128 Y83 were earlier listed as critical residues for RBD-ACE2 interactions (Figure 1B-C and Figure  
129 S1)[9,12,26]. All these residue positions are situated around the core and the rim of the  
130 RBD-ACE2 interface. The top enriching mutations on the RBD side are Q493M, S477D,  
131 F490K, N501F, V503M, E484R, Q498H, and on the ACE2 side are T27L, Q42C, S19P (Table  
132 S1). Further investigation of these mutations did not lead to a generalized pattern for  
133 understanding RBD-ACE2 recognition.

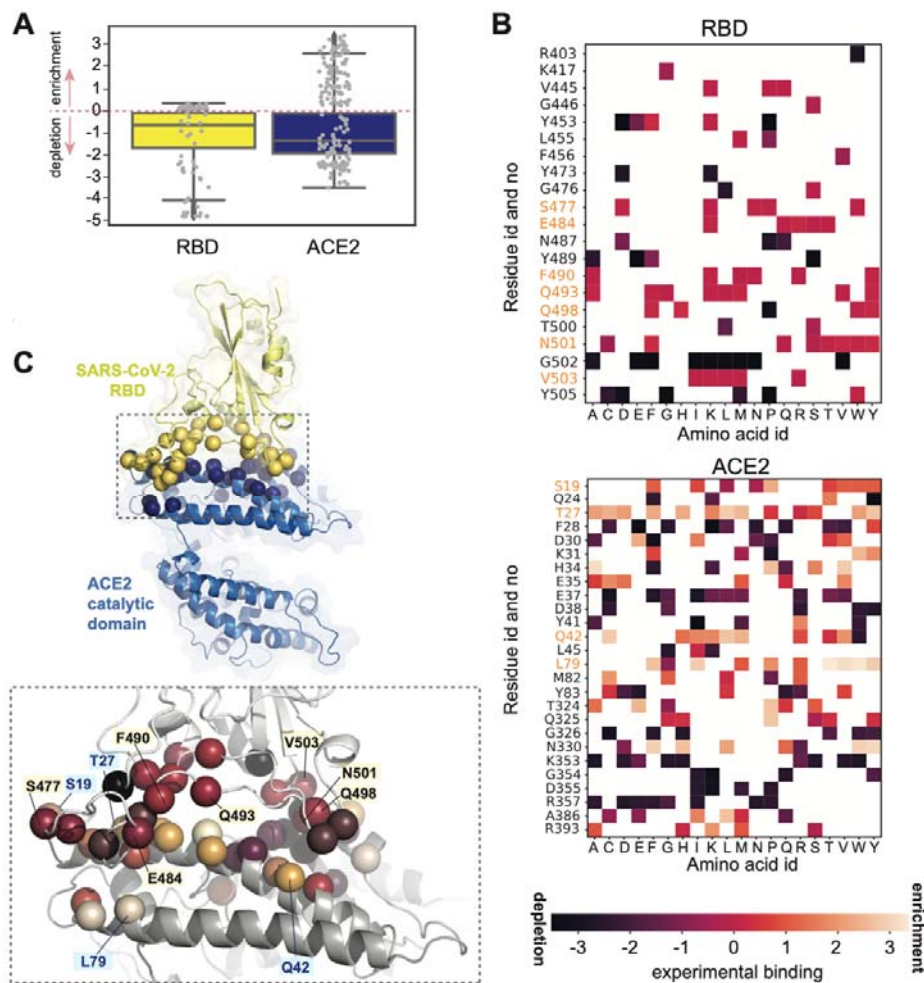

134  
135 **Figure 1. (A) RBD-ACE2 DMS benchmark set.** The experimental binding profile distributions of the  
136 interfacial RBD (yellow, n=494) and ACE2 (blue, n=494) mutations are represented with box-and-  
137 whisker plots. Values >0 indicate binding enriching and values <0 indicate binding depleting



138 mutations. 26.5% of this data set is selected as our benchmark set (n=262): n=84 for RBD (42  
139 enriching, 42 depleting) and n=178 for ACE2 mutations (89 enriching, 89 depleting cases)),  
140 represented as gray dots. This panel was generated in Python 3.8 by using pandas, Numpy and  
141 Seaborn libraries[34–39]. **(B) The experimental binding enrichment and depletion values of our**  
142 **benchmark set, RBD (top) and ACE2 (bottom).** The values > 0 correspond to binding enriching  
143 positions (light orange), while the values <0 represent the depleting ones (dark purple). The  
144 positions leading often to binding enriching mutations are highlighted in orange. **(C) The structural**  
145 **depiction of enriching mutations.** The interface residues of RBD-ACE2 complex are shown in  
146 spheres. The color code of the spheres follows the largest binding value measured for a given  
147 residue, as shown in Figure 1B. The important positions are highlighted with labels (yellow: RBD,  
148 blue: ACE2). The illustration is generated in PyMOL[28] using PDB 6M0J[26].

149

## 150 **Benchmarking the affinity predictors: seeking for a linear correlation**

151 For all the mutations in our benchmark set (n=262), we calculated the score change  
152 imposed by the mutations with FoldX, FoldXwater, EvoEF1, MutaBind2, SSIPe, and  
153 HADDOCK. [14–20] (Figure S2). Then, we investigated whether there is any meaningful  
154 correlation with the calculated score changes and experimental binding  
155 enrichment/depletion values (Figure 2A, Table S2). Here, a perfect correlation would have  
156 an absolute value of 1. As a result, we observed insignificant linear correlations for  
157 HADDOCK, EvoEF1, and SSIPe predictors. Mediocre correlations with R values ranging from -  
158 0.51 to -0.45 were observed for FoldX and MutaBind2. The best correlation (highest R-value)  
159 was obtained by FoldX (R = -0.51). Interestingly, including the water effect into FoldX  
160 predictions by using FoldXwater did not improve the accuracy of the original approach (R = -  
161 0.45 vs. R = -0.51). Furthermore, the enhanced scoring function of MutaBind2 built upon  
162 FoldX did not improve the original FoldX scoring (R = -0.49 vs. R = -0.51). The same was

163 observed for SSIPe, since it was built upon EvoEF1's sampling ( $R = -0.28$  vs.  $-0.27$ ). As the  
164 naïve predictor, we ran UEP on a subset of our benchmark ( $n=129$ ), as UEP is tuned to  
165 predict mutation-induced changes of residues that are in contact with more than two  
166 atoms. This effort also resulted in an insignificant correlation ( $R=0.14$ ).

167 We further calculated the pairwise correlations of score changes predicted by each  
168 algorithm (Figure 2B). This comparison revealed that HADDOCK reports the most  
169 distinct scores compared the other algorithms. We then computed all-atom Root Mean  
170 Square Deviations (RMSDs) of each generated mutant model in an all-to-all fashion to  
171 understand whether the distinct behavior of HADDOCK came from differentially modeled  
172 side chain formations (Figure S3). This analysis demonstrated that HADDOCK indeed  
173 generates the largest RMSD models compared to the models computed by the other tools.  
174 Notably, MutaBind2 and FoldX conformers resulted in the second highest RMSD cases,  
175 indicating that the further minimization steps used by MutaBind2 significantly impacts the  
176 final conformation of the FoldX models. As expected, EvoEF1 and SSIPe mutant models  
177 came out to be identical, since SSIPe utilizes EvoEF1 to structurally model the mutations.

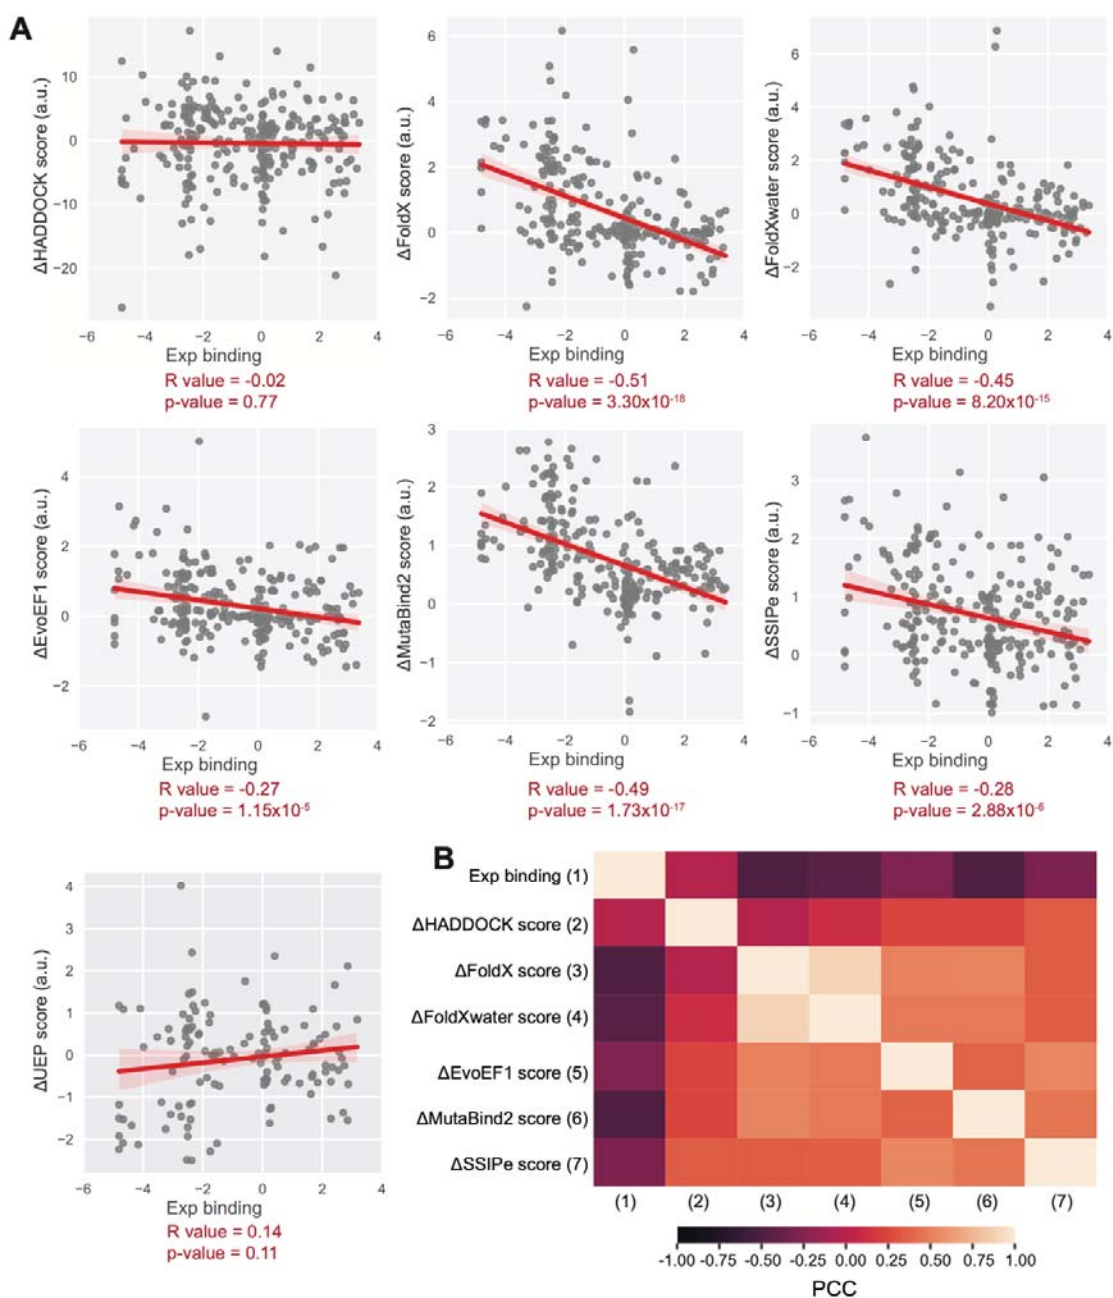

178

179 **Figure 2. (A) Correlations between experimental DMS benchmark set and the binding affinity**

180 **predictors.** Data points for all scenarios are n=262, except UEP where the number of points is 129

181 (~50% of the benchmark set). R- and p-values were calculated by using statistics and scipy libraries

182 of Python 3.8. The statistical data (R and p values) are tabulated in Table S2.

183 **(B) The correlation heatmap of the computational and the experimental scores.** The correlation

184 values are expressed in terms of Pearson Correlation Coefficients (PCC), ranging between -1 and 1.

185 Highly negatively (PCC = -1) and positively (PCC = 1) correlated predictors are colored with dark  
186 purple and light orange, respectively.

187

### 188 **Benchmarking the affinity predictors: seeking for a binary classification**

189 Apart from analyzing the correlation between  $\Delta$ Scores and experimental binding  
190 values, we also performed a binary assessment. In this assessment, the tools were tested  
191 whether they can predict the direction of binding affinity change (as enriching or depleting).  
192 Accordingly, we counted a prediction as successful if the experimental and computational  
193 data would agree whether a mutation is enriching or depleting. In this regard, the overall  
194 prediction accuracy was calculated as the percentage of correct predictions (the success  
195 rate). According to this binary assessment, the overall success rates of predictors varied  
196 between 54% and 64% (Figure 3A), where the top-ranking predictor once again came out to  
197 be FoldX (64%). FoldXwater ranked the second, once again implying that the inclusion of  
198 water effects did not improve the prediction accuracy. When we analyzed ACE2 and RBD  
199 subsets individually, better prediction rates for depleting mutations were consistently  
200 observed, despite the narrow prediction range posed by the experimental data (Figure 3A).  
201 Strikingly, MutaBind2 and SSIPe predicted most mutations as depleting, hinting at a  
202 problem in using evolutionary-based terms in scoring the host-pathogen system RBD-ACE2.  
203 These observations did not change, when we calculated the success rates only for the  
204 residues that frequently lead to enriching mutations (the highlighted residues in Figure 1B-  
205 C). To investigate this issue further, we calculated the conservation scores of RBD-ACE2  
206 interface amino acids by using ConSurf[29] (Figure S4A). As an outcome, we showed that  
207 the ACE2-RBD interface is significantly non-conserved (Figure S4B), which led to the  
208 misclassification of most mutation outcomes.

209 When we further scored the lowest ranking predictor, HADDOCK's models with  
 210 FoldX, HADDOCK's success rate increased by 5% (from 54% from 59%) (Figure S5).  
 211 Normalizing HADDOCK scores by the buried surface area (BSA) of the interface did not  
 212 improve the success rates (Figure S5). On the UEP subset, the overall prediction  
 213 performances vary within a broader range, i.e., 49%-69% (Figure 3B), where the top two  
 214 predictors became FoldX and FoldXwater (69% vs. 66%) and the lowest performing  
 215 predictors became UEP and HADDOCK (52% and 49%). On both datasets, all predictors had  
 216 difficulties in predicting binding-enriching mutations compared to the binding-depleting  
 217 ones (Figure 3).  
 218

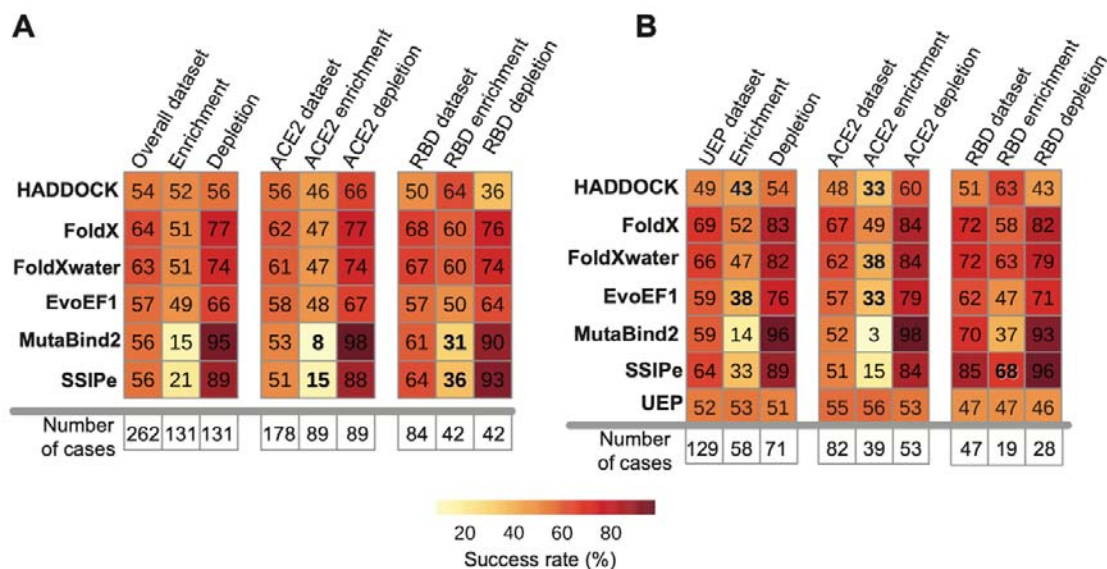

219 **Figure 3. (A) The success rates on the benchmark set (n=262). (B) Success rates of predictors are**  
 220 **calculated by using UEP's data set (n= 129).** In both panels, if the success rate changes drastically  
 221 compared to the overall dataset (first column on the left), it is shown in bold. The plots were  
 222 prepared by using R-Studio [30–33].  
 223  
 224  
 225 **Volume and hydrophobicity biases are the most obvious misprediction determinants**

226 To explore the prediction dependencies of each tool, we assessed their success rates  
227 after classifying the benchmark cases according to volume, hydrophobicity, and flexibility  
228 changes imposed by the mutations (Figure 4, Table S3, Figure S6). The residue-based  
229 volume values were taken from Zhi-hua *et al* [34], the hydrophobicity ones from Eisenberg  
230 *et al.* [35], and the flexibility ones from Shapovalov and Dunbrack [36]. For each property,  
231 we calculated the frequency distributions of the computed changes, given the enrichment  
232 or depletion status of the original mutation (Figure 4A-C). To serve as a background, we  
233 calculated the frequency distributions of the experimental data too (gray lines in Figure 4A-  
234 C). Here our assumption was a discrepancy between the tails of the experimental data and  
235 the predictors' distributions should point to an obvious bias for a given property.  
236 Accordingly, when we investigated the volume change plots, we saw that all predictors had  
237 difficulties in predicting volume decreasing mutations when the mutation induces an  
238 enrichment in binding (Figure 4A). In the case of depleting mutations, only HADDOCK has an  
239 apparent bias toward classifying volume increasing mutations wrongly. In the case of  
240 hydrophobicity change, for all predictors, there is a slight tendency to classify  
241 hydrophobicity decreasing binding enriching mutations wrongly. This is more pronounced  
242 for hydrophobicity decreasing and binding depleting mutations for HADDOCK. We did not  
243 observe any bias for the predictors regarding the changes in the side chain flexibilities.

244 To gauge whether the enriching and depletion mutation predictions were balanced  
245 for a given property, we calculated the difference between the area under the curve of the  
246 successfully predicted enriching and depletion mutations ( $\Delta$ Success, Figure S6). Here, our  
247 assumption was, if the prediction is balanced, then the  $\Delta$ Success should be close to zero. On  
248 the other hand, the  $\Delta$ Success values towards 100 and -100 should indicate extreme biases.  
249 This analysis revealed that HADDOCK has moderate volume change bias with 34  $\Delta$ Success

250 score. Normalizing HADDOCK scores by the BSA of the interface doubled this bias leading to  
251 78  $\Delta$ Success score. When HADDOCK models were scored with FoldX, the original 34  
252  $\Delta$ Success shifted to -31  $\Delta$ Success, resulting in a bias toward depleting mutations (Figure S6).  
253 When we considered the success rates based on hydrophobicity, we found out that FoldX  
254 tends to predict depleting cases better with -31  $\Delta$ Success score. Inclusion of water in FoldX  
255 (FoldXwater) increases this moderate bias ( $\Delta$ Success score -36 vs -31). The bias towards  
256 increased hydrophobicity might stem from the fact that only three of the 26 ACE2 interface  
257 residues (Y41, Y83, K353) and only six of the 26 RBD interface residues (L455, F456, N487,  
258 Y89, Q498, N501) are core interface residues, while the rest are partially or totally solvent  
259 exposed (as calculated by EPPIC [37]). The predictors are not tuned to perform well on such  
260 unusual binding sites, where a short fraction of the interface is composed of buried  
261 hydrophobic residues. As an outcome, we observed challenges in predicting mutations with  
262 changes in hydrophobicity. Finally, we could not find any relation between the flexibility  
263 change and success rate of predictors (Figure 4C and Figure S6). Finally, we found that  
264  $\Delta$ Success is extremely skewed for all metrics for MutaBind2 and SSIPe, since they predict  
265 almost all mutations as depleting.

266 To present a complete analysis, we also investigated the impact of the  
267 physicochemical property changes induced by each mutation on the prediction accuracy  
268 (Figure 4D). The physicochemical change classes we considered were no change, polarity  
269 loss/gain, and charge loss/gain. To serve as a background, we calculated the share of each  
270 class within the original data set (gray bars in Figure 4D). As a result, we could not observe  
271 any specific bias given a physicochemical property change. The success shares reflect the  
272 general trends observed in successfully predicting binding enriching or depletion mutations,  
273 as shown in Figure 4A.

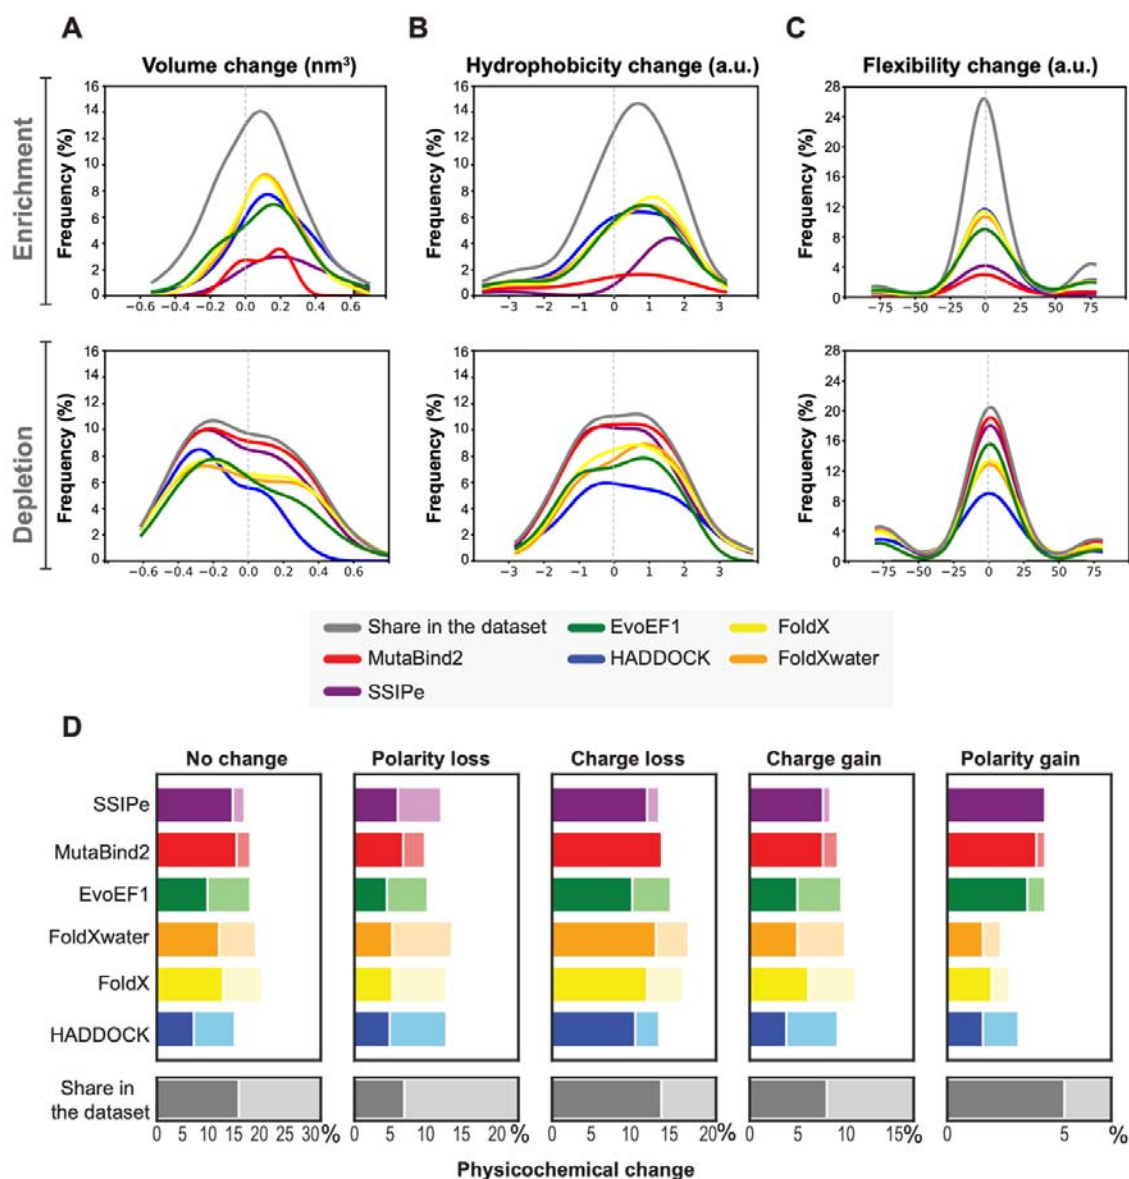

274

275

**Figure 4. The effects of mutation-induced changes in the amino acid physical properties on the**

276

**predictor's success rates according to (A) Volume change, (B) Hydrophobicity change, (C) Flexibility**

277

change. The original data set distribution for a given binding class is plotted in gray. The other

278

predictors are colored as provided in the legend. Volume/hydrophobicity/flexibility-increasing

279

mutations reside on the “positive side” of the plot (x-axis value >0), whereas

280

volume/hydrophobicity/flexibility-decreasing mutations reside on the “negative side” of the plot (x-

281

axis value <0) **(D)** The percentage of the correctly predicted cases, given the physicochemical change

282

induced upon mutation when polarity and charge states are considered, and light colors represent



283 successfully predicted depleting and enriching cases, respectively. The original data share for a given  
284 class in the dataset is plotted in grey.

285

### 286 **Which other physicochemical factors could play a role in the misprediction of mutations?**

287 Interestingly, we could not observe any bias over the correctly predicted cases when  
288 the experimental data spared was considered (Figure S7A). This observation directed our  
289 attention towards a factor that is missing in all these assessments, namely, the RBD/ACE2  
290 glycan chains. Both the catalytic domain of ACE2 and RBD contains multiple glycosylation  
291 sites, the impact of which were explored by detailed all-atom MD simulations [38–44].  
292 Nguyen *et al.*, for example, conducted simulations involving non-glycan, MAN9-glycan, and  
293 FA2-glycan ACE2-RBD MD simulations for more than 200 microseconds [38]. As an  
294 outcome, they revealed that ACE2 glycans impact virus binding affinity through electrostatic  
295 effects, without disrupting the physical contacts established between the virus and its host.  
296 The direct impact of the glycans on the ACE2-RBD binding affinity were demonstrated  
297 experimentally too[45]. To explore the potential impact of missing glycan chains in our  
298 calculations, we computed the distances from wrongly predicted mutation sites to the six  
299 ACE2 glycosylation sites (N53, N90, N103, N322, N432, N546) (Figure S7B). This analysis  
300 showed that for all the predictors, at least one fourth of the wrongly predicted mutation  
301 sites fall within 20 Å of these six sites, endorsing the role of missing glycans. Here, we should  
302 note that HADDOCK provides an option to incorporate glycans into the predictions. Though,  
303 as demonstrated earlier, its use will be limited to very short glycan chains presented in the  
304 reference EM structure[10]. We therefore did not resort to this option for the sake of being  
305 consistent in our benchmarking.

### 306 **Can AI methods perform better than the classical techniques?**

307           During recent years, several AI methods have been proposed for predicting  
308 mutation-imposed interaction changes [21–23,46–48]. Among these tools, we concentrated  
309 on two, mmCSM-PPI[22] and TopNetTree[23,24], of which results on the RBD-ACE2 system  
310 were readily available. [24,49–56]. The machine learning approach, mmCSM-PPI, utilizes  
311 physicochemical and geometrical properties of protein structures within a graph-based  
312 structural framework to model the impact of mutations on the inter-residue interaction  
313 network. mmCSM-PPI includes evolutionary scores, non-covalent interactions, and  
314 dynamics terms from Normal Mode Analysis. We ran mmCSM-PPI against our experimental  
315 data set through their user-friendly web interface and obtained an R value of 0.53, which is  
316 as high as the one from FoldX (Figure S8A, Table S2). mmCSM-PPI2 produced the most  
317 similar results to MutaBind2 and SSIPe, with PCC values of 0.70 and 0.50, respectively  
318 (Figure S8B). In predicting the direction of mutation impact, the overall success rate for  
319 mmCSM-PPI2 became 57%, with success rates of 22% for enriching and 92% for depleting  
320 mutations (Figure S8C-D). The failure of mmCSM-PPI in predicting the enriching mutations  
321 aligns well with the behavior of other two evolutionary-inclusive MutaBind2 and SSIPe  
322 algorithms.

323           TopNetTree, a recent deep learning approach, includes physical pairwise  
324 interactions, Euclidean distances, and cavity structures within a topological framework.  
325 Notably, TopNetTree has been actively used in numerous SARS-CoV-2 studies[46,50,52–  
326 54,56]. In particular, Chen et al., trained TopNetTree on SARS-CoV-2 datasets to accurately  
327 predict changes in binding free energy for the S protein, ACE2, or antibodies induced by  
328 mutations[24]This tool was not available as a web server or a standalone tool. Though, since  
329 its RBD mutation profiles were published earlier, we could take them as a basis in our  
330 assessment [24]. Over our RBD data set, TopNetTree obtained an R value of -0.01 (Figure

331 S9A), indicating a lack of meaningful correlation. So, although this approach was specifically  
332 trained to predict the outcome of mutations on the complete S protein, it fails to predict the  
333 impact of its interfacial mutations. We further observed that, like in the other methods,  
334 TopNetTree predicts the depleting cases more efficiently (64% success rate) than the  
335 enriching ones (48% success rate) (Figure S9C-D). It also generates the most diverse set of  
336 predictions compared to the other probed methods (Figure S9B).

337         Expanding on these results, we claim that, contrary to expectation, machine/deep  
338 learning approaches do not yield significantly better results on the RBD-ACE2 system,  
339 compared to the classical force-field-based techniques.

## 340 CONCLUSION

341 In the early months of SARS-CoV-2 pandemic, several fast and user-friendly mutation  
342 modeling and scoring tools, such as FoldX and HADDOCK, were heavily used to predict the  
343 impact of Spike/ACE2 variations across the Spike-ACE2 interface. Expanding on these  
344 efforts, in this work, we benchmarked six fast and commonly used structure-based binding  
345 affinity predictors (FoldX, EvoEF1, MutaBind2, SSIPe, HADDOCK, and UEP) and two AI  
346 approaches (mCSM-PPI and TopNetTree) against the RBD-ACE2 DMS binding data. As a  
347 result, we observed that none of the predictors could produce a meaningful correlation with  
348 the experimental data (best correlation R-value -0.51 was obtained with FoldX). Even when  
349 a binary classification (binding enriching/depleting) was considered, the highest accuracy  
350 was obtained by FoldX with 64% success rate. Furthermore, all predictors had difficulties in  
351 predicting binding enriching mutations, especially the ones using conservation-based terms  
352 in their scoring. Finally, the most obvious biases in mispredictions were found to be toward  
353 volume and hydrophobicity changes, especially for HADDOCK and FoldX, respectively.

354 These observations suggest plenty of room to improve the affinity predictors for  
355 guessing the variant-induced binding profile changes of host-pathogen systems, such as  
356 Spike-ACE2. To aid such improvements we provide our benchmarking data at  
357 <https://github.com/CSB-KaracaLab/RBD-ACE2-MutBench> with the option to visualize our  
358 mutant models at <https://rbd-ace2-mutbench.github.io/>. We hope that our benchmarking  
359 study will guide the computational community for being prepared not only for combatting  
360 SARS-CoV-2-related health concerns but also other infectious diseases.

## 361 **MATERIALS and METHODS**

### 362 **Interfacial DMS value selection**

363 The original DMS sets contained 3,819 and 2,223 point mutations for RBD and ACE2,  
364 respectively. From this set, we isolated the interfacial 988 RBD-ACE2 point mutations, for  
365 the following residues (calculated over 6m0j[26] with PDBePISA[25] (Figure 1C)):

366 *Twenty-six RBD positions: R403, K417, V445, G446, Y449, Y453, L455, F456, Y473, A475,*  
367 *G476, S477, Q484, G485, F486, N487, Y489, F490, Q493, G496, Q498, T500, N501, G502,*  
368 *V503, and Y505.*

369 *Twenty-six ACE2 positions: S19, Q24, T27, F28, D30, K31, H34, E35, E37, D38, Y41, Q42, L45,*  
370 *L79, M82, Y83, T324, Q325, G326, N330, K353, G354, D355, R357, A386, R393.*

371

### 372 **Structure-based binding affinity predictors**

373 Below are the brief scoring description of each predictor used. Except for UEP, all  
374 predictors explicitly model the mutation according to predictor's force field. Except for  
375 HADDOCK, these predictors sample a single conformation of the mutation.

376 **FoldX:** The scoring function of FoldX is a linear sum of vdW energy ( $\Delta G_{vdw}$ ), hydrophobic  
377 ( $\Delta G_{solvH}$ ) and polar group desolvation ( $\Delta G_{solvP}$ ) energies, hydrogen bond energy from water  
378 molecules ( $\Delta G_{wb}$ ), hydrogen bond energy ( $\Delta G_{hbond}$ ), electrostatic energy ( $\Delta G_{el}$ ), the  
379 electrostatic contribution of different polypeptides ( $\Delta G_{kon}$ ), entropic penalty for backbone  
380 ( $\Delta S_{mc}$ ), entropic penalty of the side chain ( $\Delta S_{sc}$ ), and steric overlaps ( $\Delta G_{clash}$ ) (Eq. 1). FoldX  
381 also has an option to include the contribution of water molecules to the binding affinity  
382 (FoldXwater).

383 
$$E_{\text{FoldX}} = a * \Delta G_{\text{vdw}} + b * \Delta G_{\text{solvH}} + c * \Delta G_{\text{solvP}} + d * \Delta G_{\text{wb}} + e * \Delta G_{\text{hbond}} + f * \Delta G_{\text{el}} + g * \Delta G_{\text{k}_{\text{on}}} + h * T$$

384 
$$\Delta S_{\text{mc}} + k * T \Delta S_{\text{sc}} + l * \Delta G_{\text{clash}} \text{ (Eq. 1)}$$

385 **EvoEF1:** The scoring function of EvoEF1 contains van der Waals ( $E_{\text{vdw}}$ ), electrostatics ( $E_{\text{elec}}$ ),  
386 hydrogen bond ( $E_{\text{HB}}$ ), desolvation energies ( $E_{\text{solv}}$ ), and the energy of a reference state ( $E_{\text{ref}}$ )  
387 (Eq. 2).

388 
$$E_{\text{EvoEF1}} = [E_{\text{vdw}} + E_{\text{elec}} + E_{\text{HB}} + E_{\text{solv}}] - E_{\text{ref}} \text{ (Eq. 2)}$$

389 **MutaBind2** and **SSIpe:** use FoldX and EvoEF1, respectively, to explicitly model the desired  
390 mutation. MutaBind2 further imposes relaxation and utilizes extra force field and contact-  
391 based terms, together with a metric measuring the evolutionary conservation of the  
392 mutation site. All these terms are incorporated into a random forest based scoring  
393 algorithm. SSIpe uses EvoEF1 energy terms and residue conservation-related terms,  
394 extracted from iAlign[57] and PSI-BLAST[58].

395 **HADDOCK:** In this work, we used HADDOCK water refinement to model the mutations. The  
396 complexes then scored according to the sum of three terms, van der Waals, electrostatic,  
397 and desolvation energy (Eq.3) [59]. For each HADDOCK modeling, we generated 250  
398 conformations, and subsequently selected the conformation with the lowest HADDOCK  
399 score for further analysis.

400 
$$E_{\text{HADDOCK}} = w * E_{\text{vdw}} + w * E_{\text{elec}} + w * E_{\text{desolv}} \text{ (Eq. 3)}$$

401 **UEP:** UEP predicts the impact of all possible interfacial mutations, when the position of  
402 interest has interactions with at least two other residues (within 5Å range). The scoring  
403 function of UEP expands on the statistically determined intermolecular contact potentials.

404 To run FoldX and EvoEF1, we used their stand-alone packages  
405 (<http://foldxsuite.crg.eu/products#foldx>, <https://github.com/tommyhuangthu/EvoEF1>).  
406 HADDOCK, MutaBind2, and SSIpe were run on their servers, as given in

407 <https://milou.science.uu.nl/services/HADDOCK2.2/>,

408 <https://lilab.jysw.suda.edu.cn/research/mutabind2/> <https://zhanggroup.org/SSIPe/>.

409 MutaBind2, SSIPe, and UEP directly provide the binding affinity change predictions, whereas

410 for the rest we calculated the predicted binding affinity change according to Eq. 4:

411 
$$\Delta\Delta G_{\text{predicted}} = \Delta G_{\text{mut}} - \Delta G_{\text{wt}} \text{ (Eq. 4)}$$

412 A mutation is evaluated as binding enriching if the predicted binding value change

413 ( $\Delta\text{Score}_{\text{predicted}}$ ) is <0 and binding depleting, if ( $\Delta\text{Score}_{\text{predicted}}$ ) is >0.

414

#### 415 **Conservation analysis**

416 To investigate why the evolutionary-based approaches failed, we used ConSurf[29] on RBD

417 and ACE2. ConSurf assigns a conservation score to each residue within the protein complex,

418 ranging from 1 to 9, with 1 indicating non-conserved residues and 9 signifying highly

419 conserved ones.

#### 420 **Performance evaluation according to change in amino acid physical properties upon a**

#### 421 **mutation**

422 The predictions were evaluated from the perspectives of volume, hydrophobicity,

423 flexibility, and physicochemical property change upon mutation ( $\Delta\text{Property}_{\text{change}} =$

424  $\text{Property}_{\text{mutation}} - \text{Property}_{\text{wildtype}}$ , Table S3). The physicochemical properties considered were:

425 polar amino acids - N, Q, S, T, Y; non-polar amino acids - A, G, I, L, M, F, P, W, V, C; charged

426 amino acids - H, E, D, R, K. Success rate and metric evaluations were performed in Python

427 3.8.5 with Pandas, Numpy, seaborn, and Matplotlib libraries [60–65]. For each category, the

428 percentage of successfully predicted cases were calculated by Eq. 5.

429 
$$\text{Success rate} = \text{Correct-Predictions}/\text{All-Predictions} * 100 \text{ (Eq. 5)}$$





431 **DATA AVAILABILITY**

432 All results including the codes and notebooks are deposited in Github  
433 (<https://github.com/CSB-KaracaLab/RBD-ACE2-MutBench>) and the models and the scores  
434 can be visualized at <https://rbd-ace2-mutbench.github.io/>.

435

436 **SUPPLEMENTARY INFORMATION**

437 Supplementary Information are submitted with the manuscript.

438

439 **ACKNOWLEDGEMENTS**

440 All the simulations and analyses were carried out in the HPC resources of Izmir Biomedicine  
441 and Genome Center. The authors would like to thank João P. G. L. M. Rodrigues for the  
442 critical reading of our manuscript and providing help in building our results visualization  
443 page.

444

445 **FUNDING**

446 This work was supported by EMBO Installation Grant (no. 4421), Young Scientist Award  
447 granted by the Turkish Science Academy, and TÜSEB Research Grant (no. 3933).

448

449 **AUTHOR CONTRIBUTIONS**

450 B.O. performed predictor runs, statistical analysis and RMSD calculations, generated  
451 structural and statistical figures, edited and finalized all the figures, prepared the Github  
452 page, and wrote the manuscript. E. Ş. performed predictor runs, calculated the physical  
453 property and binary success rates, prepared the Github page, contributed to writing  
454 Introduction and Methods & Materials sections. A.Ö performed deep learning predictor

455 runs and the statistical analysis. M.E. generated heatmap tables for success rate results and  
456 wrote the manuscript. M.K. performed predictor runs, generated heatmaps for the RMSD  
457 calculations and predictor scores. M.O. performed the most enriching mutation analysis.  
458 C.Y. performed predictor runs. N. A. and G. K. prepared the visualization page on Github. A.  
459 B. B. and B.S. worked on the conceptualization of the benchmark set. E. K. conceptualized  
460 the study, overlooked the project, and wrote the manuscript.

461

462 **CONFLICT OF INTEREST**

463 The authors declare no competing interests.

464 REFERENCES

- 465 [1] LeDuc JW, Barry MA. SARS, the First Pandemic of the 21st Century. *Emerg*  
466 *Infect Dis* 2004;10:e26. [https://doi.org/10.3201/EID1011.040797\\_02](https://doi.org/10.3201/EID1011.040797_02).
- 467 [2] Durai P, Batool M, Shah M, Choi S. Middle East respiratory syndrome  
468 coronavirus: transmission, virology and therapeutic targeting to aid in outbreak  
469 control. *Exp Mol Med* 2015;47:e181. <https://doi.org/10.1038/EMM.2015.76>.
- 470 [3] Platto S, Xue T, Carafoli E. COVID19: an announced pandemic n.d.  
471 <https://doi.org/10.1038/s41419-020-02995-9>.
- 472 [4] Li W, Moore MJ, Vasllieva N, Sui J, Wong SK, Berne MA, et al. Angiotensin-  
473 converting enzyme 2 is a functional receptor for the SARS coronavirus. *Nature*  
474 2003;426:450. <https://doi.org/10.1038/NATURE02145>.
- 475 [5] Ali A, Vijayan R. Dynamics of the ACE2–SARS-CoV-2/SARS-CoV spike  
476 protein interface reveal unique mechanisms. *Sci Rep* 2020;10.  
477 <https://doi.org/10.1038/s41598-020-71188-3>.
- 478 [6] CoVariants n.d. <https://covariants.org/> (accessed June 27, 2022).
- 479 [7] Chan KK, Dorosky D, Sharma P, Abbasi SA, Dye JM, Kranz DM, et al.  
480 Engineering human ACE2 to optimize binding to the spike protein of SARS  
481 coronavirus 2. *Science* (1979) 2020;369.  
482 <https://doi.org/10.1126/SCIENCE.ABC0870>.
- 483 [8] Starr TN, Greaney AJ, Hilton SK, Ellis D, Crawford KHD, Dingens AS, et al.  
484 Deep Mutational Scanning of SARS-CoV-2 Receptor Binding Domain Reveals  
485 Constraints on Folding and ACE2 Binding. *Cell* 2020;182:1295-1310.e20.  
486 <https://doi.org/10.1016/j.cell.2020.08.012>.
- 487 [9] Delgado Blanco J, Hernandez-Alias X, Cianferoni D, Serrano L. In silico  
488 mutagenesis of human ACE2 with S protein and translational efficiency explain  
489 SARS-CoV-2 infectivity in different species. *PLoS Comput Biol*  
490 2020;16:e1008450. <https://doi.org/10.1371/journal.pcbi.1008450>.
- 491 [10] Rodrigues JPGLM, Barrera-Vilarmau S, M. C. Teixeira J, Sorokina M, Seckel  
492 E, Kastritis PL, et al. Insights on cross-species transmission of SARS-CoV-2  
493 from structural modeling. *PLoS Comput Biol* 2020;16:e1008449.  
494 <https://doi.org/10.1371/journal.pcbi.1008449>.
- 495 [11] Sorokina M, M. C. Teixeira J, Barrera-Vilarmau S, Paschke R, Papatotiriou I,  
496 Rodrigues JPGLM, et al. Structural models of human ACE2 variants with  
497 SARS-CoV-2 Spike protein for structure-based drug design. *Sci Data*  
498 2020;7:309. <https://doi.org/10.1038/s41597-020-00652-6>.
- 499 [12] Laurini E, Marson D, Aulic S, Fermeglia M, Pricl S. Computational Alanine  
500 Scanning and Structural Analysis of the SARS-CoV-2 Spike  
501 Protein/Angiotensin-Converting Enzyme 2 Complex. *ACS Nano* 2020;14.  
502 <https://doi.org/10.1021/acsnano.0c04674>.
- 503 [13] Gheeraert A, Vuillon L, Chaloin L, Moncorgé O, Very T, Perez S, et al.  
504 Singular Interface Dynamics of the SARS-CoV-2 Delta Variant Explained with  
505 Contact Perturbation Analysis. *J Chem Inf Model* 2022;62:3107–22.  
506 <https://doi.org/10.1021/ACS.JCIM.2C00350>.
- 507 [14] Schymkowitz J, Borg J, Stricher F, Nys R, Rousseau F, Serrano L. The FoldX  
508 web server: An online force field. *Nucleic Acids Res* 2005;33.  
509 <https://doi.org/10.1093/nar/gki387>.
- 510 [15] Pearce R, Huang X, Setiawan D, Zhang Y. EvoDesign: Designing Protein–  
511 Protein Binding Interactions Using Evolutionary Interface Profiles in

- 512 Conjunction with an Optimized Physical Energy Function. *J Mol Biol*  
513 2019;431. <https://doi.org/10.1016/j.jmb.2019.02.028>.
- 514 [16] Zhang N, Chen Y, Lu H, Zhao F, Alvarez RV, Goncarenco A, et al.  
515 MutaBind2: Predicting the Impacts of Single and Multiple Mutations on  
516 Protein-Protein Interactions. *IScience* 2020;23.  
517 <https://doi.org/10.1016/j.isci.2020.100939>.
- 518 [17] Huang X, Zheng W, Pearce R, Zhang Y, Zhang Y. SSIPe: Accurately  
519 estimating protein-protein binding affinity change upon mutations using  
520 evolutionary profiles in combination with an optimized physical energy  
521 function. *Bioinformatics* 2020;36.  
522 <https://doi.org/10.1093/bioinformatics/btz926>.
- 523 [18] Van Zundert GCP, Rodrigues JPGLM, Trellet M, Schmitz C, Kastrius PL,  
524 Karaca E, et al. The HADDOCK2.2 Web Server: User-Friendly Integrative  
525 Modeling of Biomolecular Complexes. *J Mol Biol* 2016.  
526 <https://doi.org/10.1016/j.jmb.2015.09.014>.
- 527 [19] Honorato R V., Koukos PI, Jiménez-García B, Tsaregorodtsev A, Verlati M,  
528 Giachetti A, et al. Structural Biology in the Clouds: The WeNMR-EOSC  
529 Ecosystem. *Front Mol Biosci* 2021;8.  
530 <https://doi.org/10.3389/fmolb.2021.729513>.
- 531 [20] Amengual-Rigo P, Fernández-Recio J, Guallar V. UEP: an open-source and fast  
532 classifier for predicting the impact of mutations in protein-protein complexes.  
533 *Bioinformatics* 2021;37. <https://doi.org/10.1093/bioinformatics/btaa708>.
- 534 [21] Rodrigues CHM, Pires DEV, Ascher DB. MmCSM-PPI: Predicting the effects  
535 of multiple point mutations on protein-protein interactions. *Nucleic Acids Res*  
536 2021;49:W417–24. <https://doi.org/10.1093/nar/gkab273>.
- 537 [22] Rodrigues CHM, Myung Y, Pires DEV, Ascher DB. MCSM-PPI2: predicting  
538 the effects of mutations on protein-protein interactions. *Nucleic Acids Res*  
539 2019;47:W338–44. <https://doi.org/10.1093/nar/gkz383>.
- 540 [23] Wang M, Cang Z, Wei GW. A topology-based network tree for the prediction  
541 of protein–protein binding affinity changes following mutation. *Nat Mach Intell*  
542 2020;2:116–23. <https://doi.org/10.1038/s42256-020-0149-6>.
- 543 [24] Chen J, Wang R, Wang M, Wei GW. Mutations Strengthened SARS-CoV-2  
544 Infectivity. *J Mol Biol* 2020;432:5212–26.  
545 <https://doi.org/10.1016/j.jmb.2020.07.009>.
- 546 [25] Krissinel E, Henrick K. Inference of Macromolecular Assemblies from  
547 Crystalline State. *J Mol Biol* 2007;372:774–97.  
548 <https://doi.org/10.1016/j.jmb.2007.05.022>.
- 549 [26] Lan J, Ge J, Yu J, Shan S, Zhou H, Fan S, et al. Structure of the SARS-CoV-2  
550 spike receptor-binding domain bound to the ACE2 receptor. *Nature*  
551 2020;581:215–20. <https://doi.org/10.1038/s41586-020-2180-5>.
- 552 [27] Wan Y, Shang J, Graham R, Baric RS, Li F. Receptor Recognition by the Novel  
553 Coronavirus from Wuhan: an Analysis Based on Decade-Long Structural  
554 Studies of SARS Coronavirus. *J Virol* 2020;94.  
555 <https://doi.org/10.1128/jvi.00127-20>.
- 556 [28] Schrödinger LLC and DW. PyMOL n.d.
- 557 [29] Ashkenazy H, Abadi S, Martz E, Chay O, Mayrose I, Pupko T, et al. ConSurf  
558 2016: an improved methodology to estimate and visualize evolutionary  
559 conservation in macromolecules. *Nucleic Acids Res* 2016;44:W344–50.  
560 <https://doi.org/10.1093/NAR/GKW408>.
- 561 [30] Integrated Development Environment for R. RStudio n.d.

- 562 [31] A Language and Environment for Statistical Computing. R n.d.  
563 [32] Kolde R. Pheatmap: Pretty Heatmaps 2019.  
564 [33] Neuwirth E. RColorBrewer: ColorBrewer Palettes 2014.  
565 [34] Lin Z, Long H, Bo Z, Wang Y, Wu Y. New descriptors of amino acids and their  
566 application to peptide QSAR study. *Peptides (NY)* 2008;29:1798–805.  
567 <https://doi.org/10.1016/j.peptides.2008.06.004>.  
568 [35] Eisenberg D, Schwarz E, Komaromy M, Wall R. Analysis of membrane and  
569 surface protein sequences with the hydrophobic moment plot. *J Mol Biol*  
570 1984;179:125–42. [https://doi.org/10.1016/0022-2836\(84\)90309-7](https://doi.org/10.1016/0022-2836(84)90309-7).  
571 [36] Shapovalov MV, Dunbrack RL. A Smoothed Backbone-Dependent Rotamer  
572 Library for Proteins Derived from Adaptive Kernel Density Estimates and  
573 Regressions. *Structure* 2011;19:844–58.  
574 <https://doi.org/10.1016/j.str.2011.03.019>.  
575 [37] Bliven S, Lafita A, Parker A, Capitani G, Duarte JM. Automated evaluation of  
576 quaternary structures from protein crystals. *PLoS Comput Biol* 2018;14.  
577 <https://doi.org/10.1371/journal.pcbi.1006104>.  
578 [38] Nguyen K, Chakraborty S, Mansbach RA, Korber B, Gnanakaran S. Exploring  
579 the role of glycans in the interaction of sars-cov-2 rbd and human receptor ace2.  
580 *Viruses* 2021;13. <https://doi.org/10.3390/v13050927>.  
581 [39] Mehdipour AR, Hummer G. Dual nature of human ACE2 glycosylation in  
582 binding to SARS-CoV-2 spike 2021;118:2100425118.  
583 <https://doi.org/10.1073/pnas.2100425118/-/DCSupplemental>.  
584 [40] Zhao P, Praissman JL, Grant OC, Cai Y, Xiao T, Rosenbalm KE, et al. Virus-  
585 Receptor Interactions of Glycosylated SARS-CoV-2 Spike and Human ACE2  
586 Receptor. *Cell Host Microbe* 2020;28:586-601.e6.  
587 <https://doi.org/10.1016/j.chom.2020.08.004>.  
588 [41] Gong Y, Qin S, Dai L, Tian Z. The glycosylation in SARS-CoV-2 and its  
589 receptor ACE2. *Signal Transduct Target Ther* 2021;6.  
590 <https://doi.org/10.1038/s41392-021-00809-8>.  
591 [42] Mugnai ML, Shin S, Thirumalai D. Entropic contribution of ACE2 glycans to  
592 RBD binding. *Biophys J* 2023;122:2506–17.  
593 <https://doi.org/10.1016/j.bpj.2023.05.003>.  
594 [43] Cao W, Dong C, Kim S, Hou D, Tai W, Du L, et al. Biomechanical  
595 characterization of SARS-CoV-2 spike RBD and human ACE2 protein-protein  
596 interaction. *Biophys J* 2021;120:1011–9.  
597 <https://doi.org/10.1016/j.bpj.2021.02.007>.  
598 [44] Acharya A, Lynch DL, Pavlova A, Pang YT, Gumbart JC. ACE2 glycans  
599 preferentially interact with SARS-CoV-2 over SARS-CoV. *Chemical*  
600 *Communications* 2021;57:5949–52. <https://doi.org/10.1039/D1CC02305E>.  
601 [45] Isobe A, Arai Y, Kuroda D, Okumura N, Ono T, Ushiba S, et al. ACE2 N-  
602 glycosylation modulates interactions with SARS-CoV-2 spike protein in a site-  
603 specific manner. *Commun Biol* 2022;5. [https://doi.org/10.1038/s42003-022-](https://doi.org/10.1038/s42003-022-04170-6)  
604 [04170-6](https://doi.org/10.1038/s42003-022-04170-6).  
605 [46] Mohseni Behbahani Y, Laine E, Carbone A. Deep Local Analysis deconstructs  
606 protein-protein interfaces and accurately estimates binding affinity changes  
607 upon mutation. *Bioinformatics* 2023;39:I544–52.  
608 <https://doi.org/10.1093/bioinformatics/btad231>.  
609 [47] Yue Y, Li S, Wang L, Liu H, Tong HHY, He S. MpbPPI: a multi-task pre-  
610 training-based equivariant approach for the prediction of the effect of amino

- 611 acid mutations on protein–protein interactions. *Brief Bioinform* 2023.  
612 <https://doi.org/10.1093/bib/bbad310>.
- 613 [48] Rodrigues CHM, Pires DEV, Ascher DB. DynaMut2: Assessing changes in  
614 stability and flexibility upon single and multiple point missense mutations.  
615 *Protein Science* 2021;30:60–9. <https://doi.org/10.1002/pro.3942>.
- 616 [49] Xiong Q, Cao L, Ma C, Tortorici MA, Liu C, Si J, et al. Close relatives of  
617 MERS-CoV in bats use ACE2 as their functional receptors. *Nature*  
618 2022;612:748–57. <https://doi.org/10.1038/s41586-022-05513-3>.
- 619 [50] Chen J, Gao K, Wang R, Wei GW. Revealing the Threat of Emerging SARS-  
620 CoV-2 Mutations to Antibody Therapies. *J Mol Biol* 2021;433.  
621 <https://doi.org/10.1016/j.jmb.2021.167155>.
- 622 [51] Khan A, Gui J, Ahmad W, Haq I, Shahid M, Khan AA, et al. The SARS-CoV-2  
623 B.1.618 variant slightly alters the spike RBD-ACE2 binding affinity and is an  
624 antibody escaping variant: a computational structural perspective. *RSC Adv*  
625 2021;11:30132–47. <https://doi.org/10.1039/d1ra04694b>.
- 626 [52] Chen J, Wang R, Gilby NB, Wei G-W. Omicron Variant (B.1.1.529):  
627 Infectivity, Vaccine Breakthrough, and Antibody Resistance. *J Chem Inf Model*  
628 2022;62:412–22. <https://doi.org/10.1021/acs.jcim.1c01451>.
- 629 [53] Shan S, Luo S, Yang Z, Hong J, Su Y, Ding F, et al. Deep learning guided  
630 optimization of human antibody against SARS-CoV-2 variants with broad  
631 neutralization. *Proceedings of the National Academy of Sciences* 2022;119.  
632 <https://doi.org/10.1073/pnas.2122954119>.
- 633 [54] Wang R, Chen J, Gao K, Hozumi Y, Yin C, Wei GW. Analysis of SARS-CoV-  
634 2 mutations in the United States suggests presence of four substrains and novel  
635 variants. *Commun Biol* 2021;4. <https://doi.org/10.1038/s42003-021-01754-6>.
- 636 [55] Wang R, Chen J, Gao K, Wei G-W. Vaccine-escape and fast-growing mutations  
637 in the United Kingdom, the United States, Singapore, Spain, India, and other  
638 COVID-19-devastated countries. *Genomics* 2021;113:2158–70.  
639 <https://doi.org/10.1016/j.ygeno.2021.05.006>.
- 640 [56] Zeng L, Lu Y, Yan W, Yang Y. A Protein Co-Conservation Network Model  
641 Characterizes Mutation Effects on SARS-CoV-2 Spike Protein. *Int J Mol Sci*  
642 2023;24:3255. <https://doi.org/10.3390/ijms24043255>.
- 643 [57] Gao M, Skolnick J. iAlign: a method for the structural comparison of protein–  
644 protein interfaces. *Bioinformatics* 2010;26:2259–65.  
645 <https://doi.org/10.1093/bioinformatics/btq404>.
- 646 [58] Altschul SF, Madden TL, Schäffer AA, Zhang J, Zhang Z, Miller W, et al.  
647 Gapped BLAST and PSI-BLAST: A new generation of protein database search  
648 programs. *Nucleic Acids Res* 1997;25. <https://doi.org/10.1093/nar/25.17.3389>.
- 649 [59] Dominguez C, Boelens R, Bonvin AMJJ. HADDOCK: A Protein–Protein  
650 Docking Approach Based on Biochemical or Biophysical Information. *J Am*  
651 *Chem Soc* 2003;125:1731–7. <https://doi.org/10.1021/ja026939x>.
- 652 [60] Van Rossum G, Drake FL, Harris CR, Millman KJ, van der Walt SJ, Gommers  
653 R, et al. *Python 3 Reference Manual*. vol. 585. 2009.
- 654 [61] Harris CR, Millman KJ, van der Walt SJ, Gommers R, Virtanen P, Cournapeau  
655 D, et al. Array programming with NumPy. *Nature* 2020;585.  
656 <https://doi.org/10.1038/s41586-020-2649-2>.
- 657 [62] Kluyver T, Ragan-Kelley B, Pérez F, Granger B, Bussonnier M, Frederic J, et  
658 al. Jupyter Notebooks—a publishing format for reproducible computational  
659 workflows. *Positioning and Power in Academic Publishing: Players, Agents and*

- 660 Agendas - Proceedings of the 20th International Conference on Electronic  
661 Publishing, ELPUB 2016, 2016. <https://doi.org/10.3233/978-1-61499-649-1-87>.  
662 [63] Anaconda Software Distribution. Anaconda Documentation 2020.  
663 [64] The pandas development team. Pandas-dev/pandas: Pandas. Zenodo 2020.  
664 [65] Waskom M. seaborn: statistical data visualization. J Open Source Softw 2021;6.  
665 <https://doi.org/10.21105/joss.03021>.  
666
